# Supplementary material
Source: PubMed Central journal article supplement (PMC5526651)
Supplement: ph7b00285_si_001.pdf [file ph7b00285_si_001.pdf]

## Supporting information

### **High Photocurrent in Gated Graphene-Silicon Hybrid Photodiodes**

Sarah Riazimehr<sup>a,c</sup>, Satender Kataria<sup>a,c,\*</sup>, Rainer Bornemann<sup>a</sup>, Peter Haring Bolivar<sup>a</sup>,  
Francisco Javier Garcia Ruiz<sup>b</sup>, Olof Engström<sup>a</sup>, Andres Godoy<sup>b</sup> and Max C. Lemme<sup>a,c,\*</sup>

<sup>a</sup>University of Siegen, School of Science and Technology, Department of Electrical Engineering and Computer Science, Hölderlinstr. 3, 57076 Siegen, Germany

<sup>b</sup>Dpto. de Electrónica y Tecnología de Computadores, Facultad de Ciencias, Universidad de Granada, Av. Fuentenueva S/N, 18071 Granada, Spain

<sup>c</sup>RWTH Aachen University, Faculty of Electrical Engineering and Information Technology, Chair for Electronic Devices, Otto-Blumenthal-Str. 25, 52074 Aachen, Germany

\*email: Satender.kataria@rwth-aachen.de, max.lemme@rwth-aachen.de

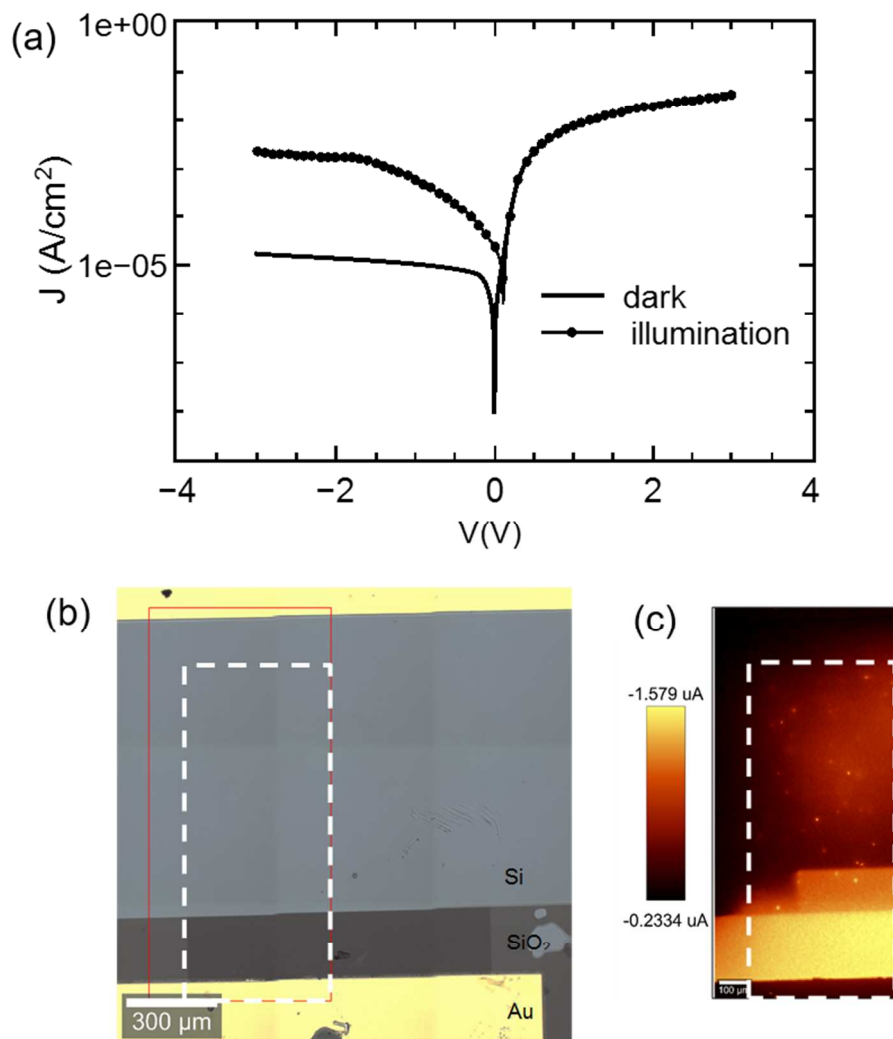

Fig. S1. (a) J-V plot of a graphene/n-Si photodiode with a large junction area in the dark and under white light illumination. Here, the oxide thickness was 85 nm. (b) Optical micrograph of the diode showing the regions of interest. Red rectangle depicts the scanned area where scanning photocurrent measurement was carried out while white dashed line shows the graphene region within the scanned area. (c) Current map of the area inside the red rectangle in (b) at a reverse bias of -2 V and at a laser power of 1 mW. The white dashed line shows the graphene region. It can be seen that the photocurrent is much higher in G/SiO<sub>2</sub>/Si compared to that in G/Si region.

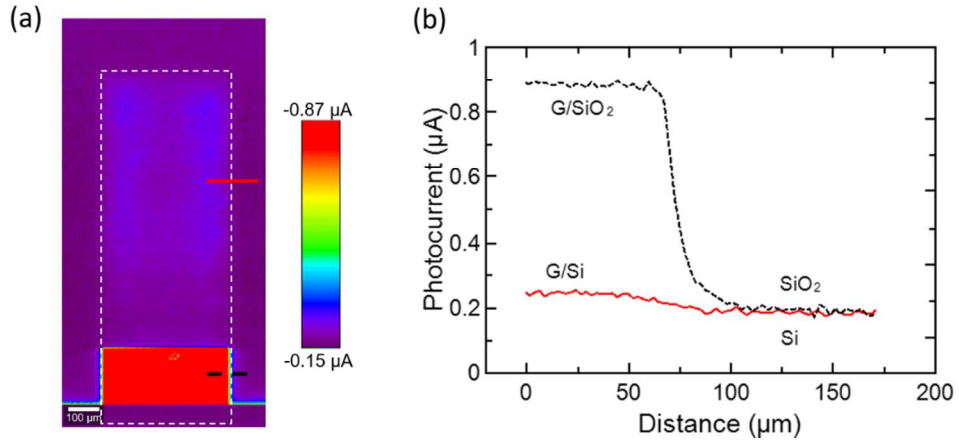

Fig. S2. (a) Photocurrent map of G/n-Si photodiode at a reverse bias of  $-2$  V and at incident laser power of  $2 \mu\text{W}$ . White line depicts the area covered by graphene. (b) Line cross-section of photocurrent across G/SiO<sub>2</sub> (black dashed line) and G/Si (red solid line) junctions along the respective lines in (a). It can be clearly seen that photocurrent decays to a certain distance away from these junctions, indicating the diffusion of minority carriers.

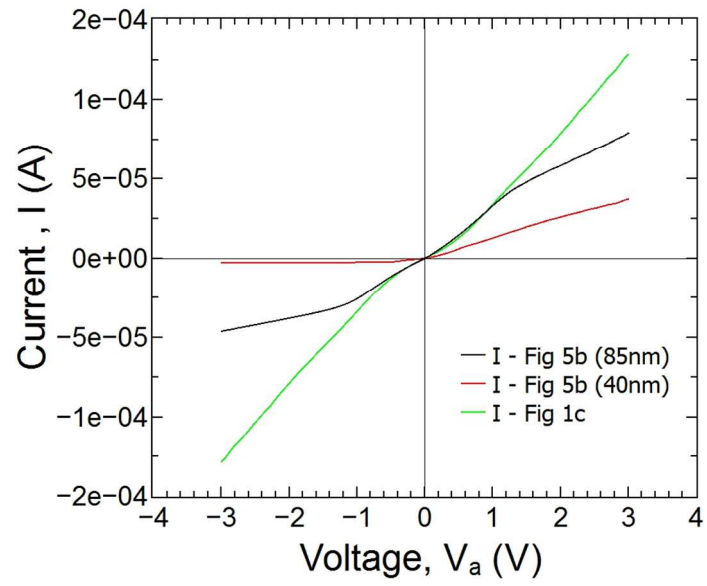

Fig. S3: I-V plot of the metal electrodes – n-Si substrate related to the devices represented in Fig 1c (green curve) and Fig 5b (red and black curves) of the manuscript.

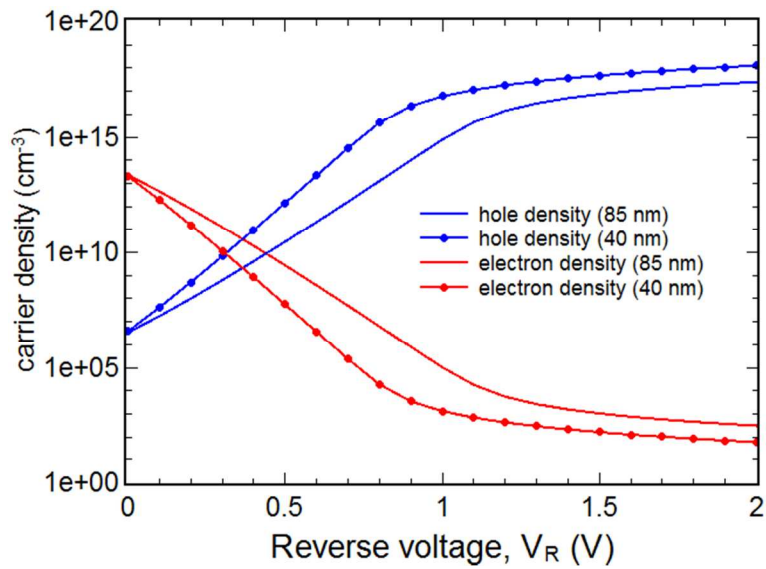

Fig. S4. Electron (red-line) and hole density (blue-line) as a function of the reverse voltage,  $V_R$ , for two oxide thickness, 40 nm (line+symbol) and 85 nm (line). A threshold voltage can be estimated around the  $V_R$  value where the change of slope, related to the creation of inversion layer, is noticeable. Also, a higher hole density is observed for 40 nm thick oxide pointing towards a stronger inversion layer compared to 85 nm thick oxide.
